# Supplementary material
Source: PubMed Central journal article supplement (PMC3790949)

### **Supplementary Figure 1**

The effect of platelet number on aggregation count. Platelets aggregation obtained from healthy volunteers were measured in a Born-lumiaggregometer in platelet rich plasma as described in the methods. The range of the platelet count was between  $2-3 \times 10^8$ /ml (white) and  $5-6 \times 10^8$ /ml (black). Aggregation results, shown as % increase in light transmission, was measured at 180 sec after agonist addition. Results are shown as mean  $\pm$  SEM (n=5).

### **Supplementary Figure 2**

(A&B): ATP secretion (nmol) in platelet rich plasma (PRP) from 70 healthy volunteers in response to PAR1 peptide SFLLRN ( $100 \mu\text{M}$ ). (2A) without normalization of platelets count to  $1 \times 10^8$  /ml. (2B) with normalization of ATP secretion to  $1 \times 10^8$  /ml.  $r^2$  is the correlation co-efficient which is a measure of the strength of the linear relationship between two variables that is defined in terms of the (sample) covariance of the variables divided by their (sample) standard deviations.

### **Supplementary Figure 3**

The participants cohort, number, median age and gender.

### **Supplementary Figure 4**

The effect of ADP and adrenaline on PGE1-stimulated cAMP formation in the participant with homozygous P2Y<sub>12</sub> mutation. Washed platelets from a healthy volunteer (control) and the participant with homozygous P2Y<sub>12</sub> mutation were incubated for 15 min with  $1 \mu\text{M}$  PGE1 in the absence or presence of ADP ( $20 \mu\text{M}$ ) or adrenaline ( $20 \mu\text{M}$ ). Initial values were obtained from PGE1-stimulated platelets and results following agonist stimulation are expressed as percentages of the initial values. n=1

### **Supplementary Figure 5**

Aggregation in a participant diagnosed with a Gq-like defect. Aggregation and ATP secretion were measured in a Born-lumiaggregometer in platelet rich plasma in the presence of chronolume reagent. The results are shown as % increase in light transmission relative to platelet-poor plasma or as the amount of secreted ATP, respectively Aggregation in a control and a participant with Gq like-defect. p: participant c: control (healthy volunteer).

S-Figure 1

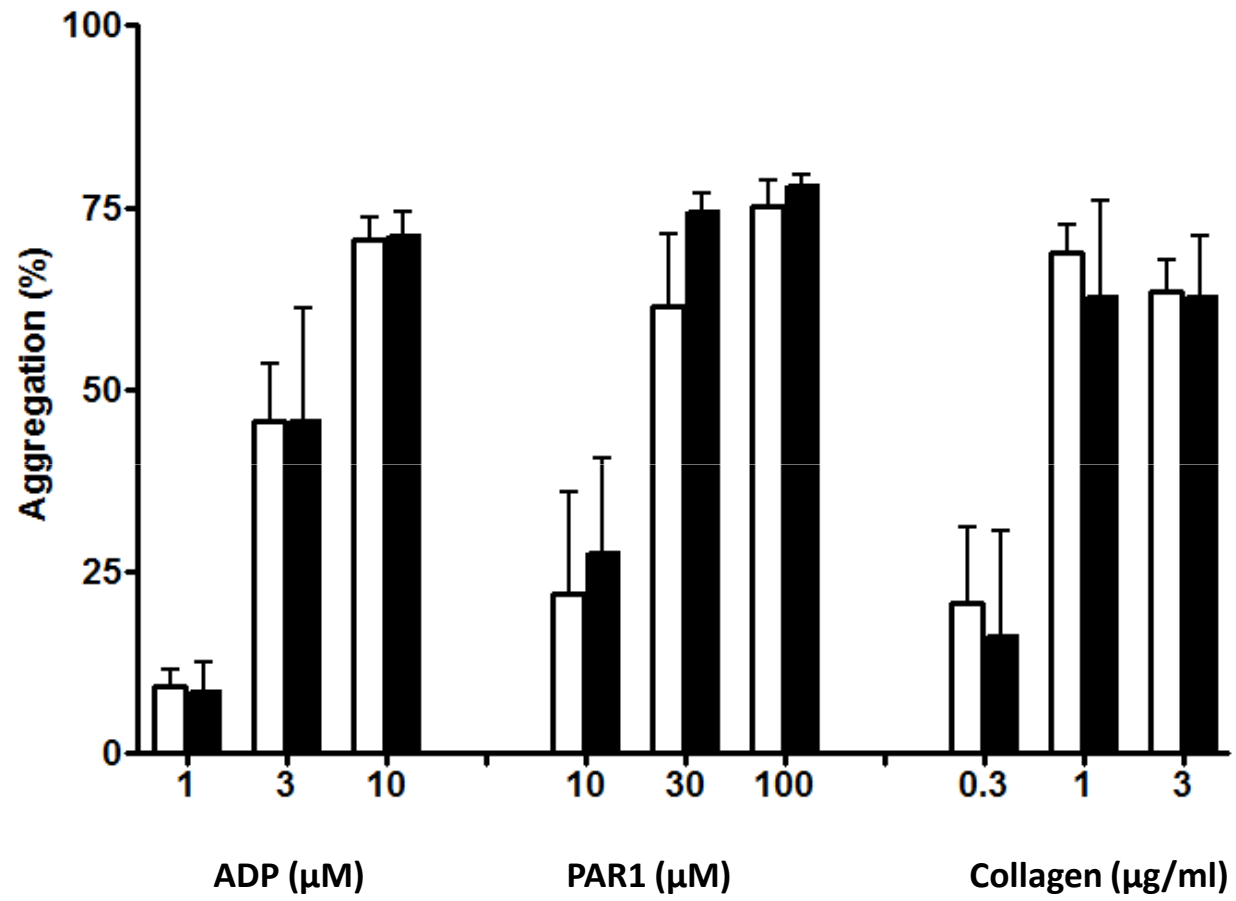

S-Figure 2

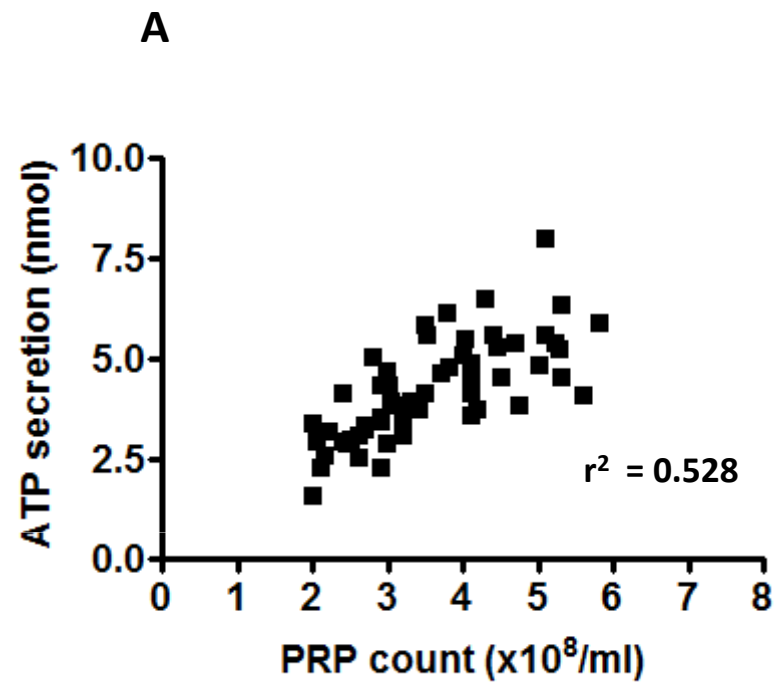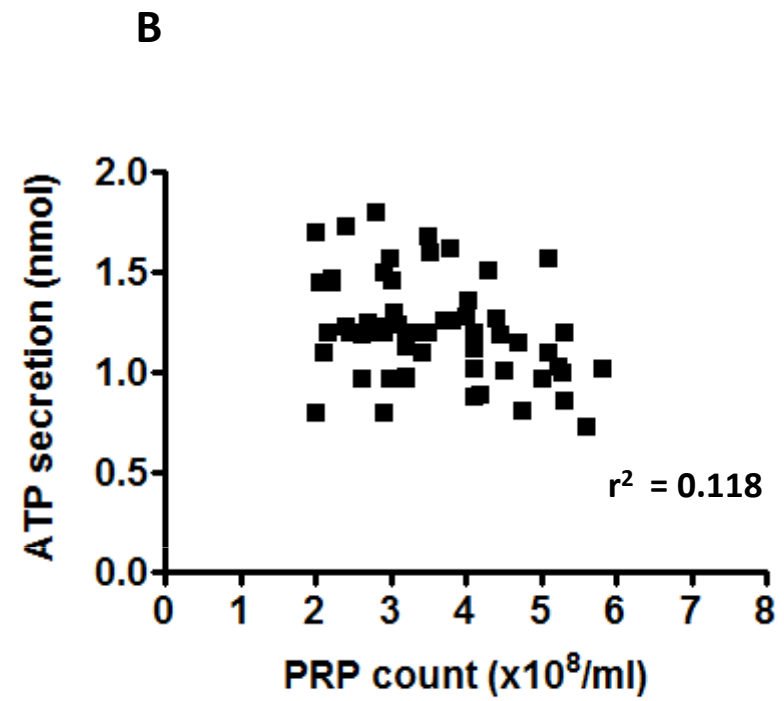

S-Figure 3

|                | No defect | Defect | Median age |
|----------------|-----------|--------|------------|
| No. of females | 38        | 43     | 40         |
| No. of males   | 9         | 21     | 25         |

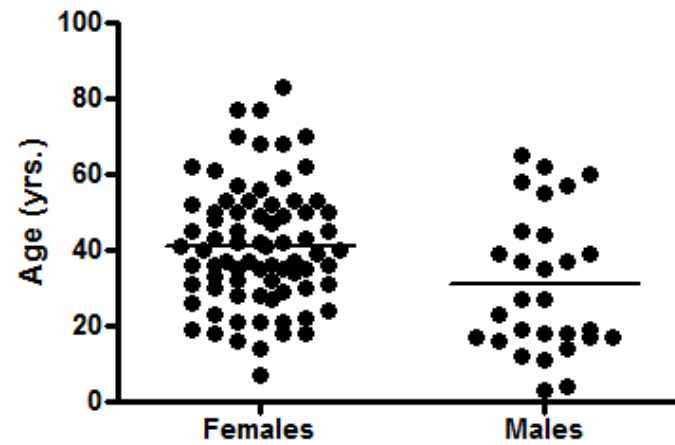

S-Figure 4

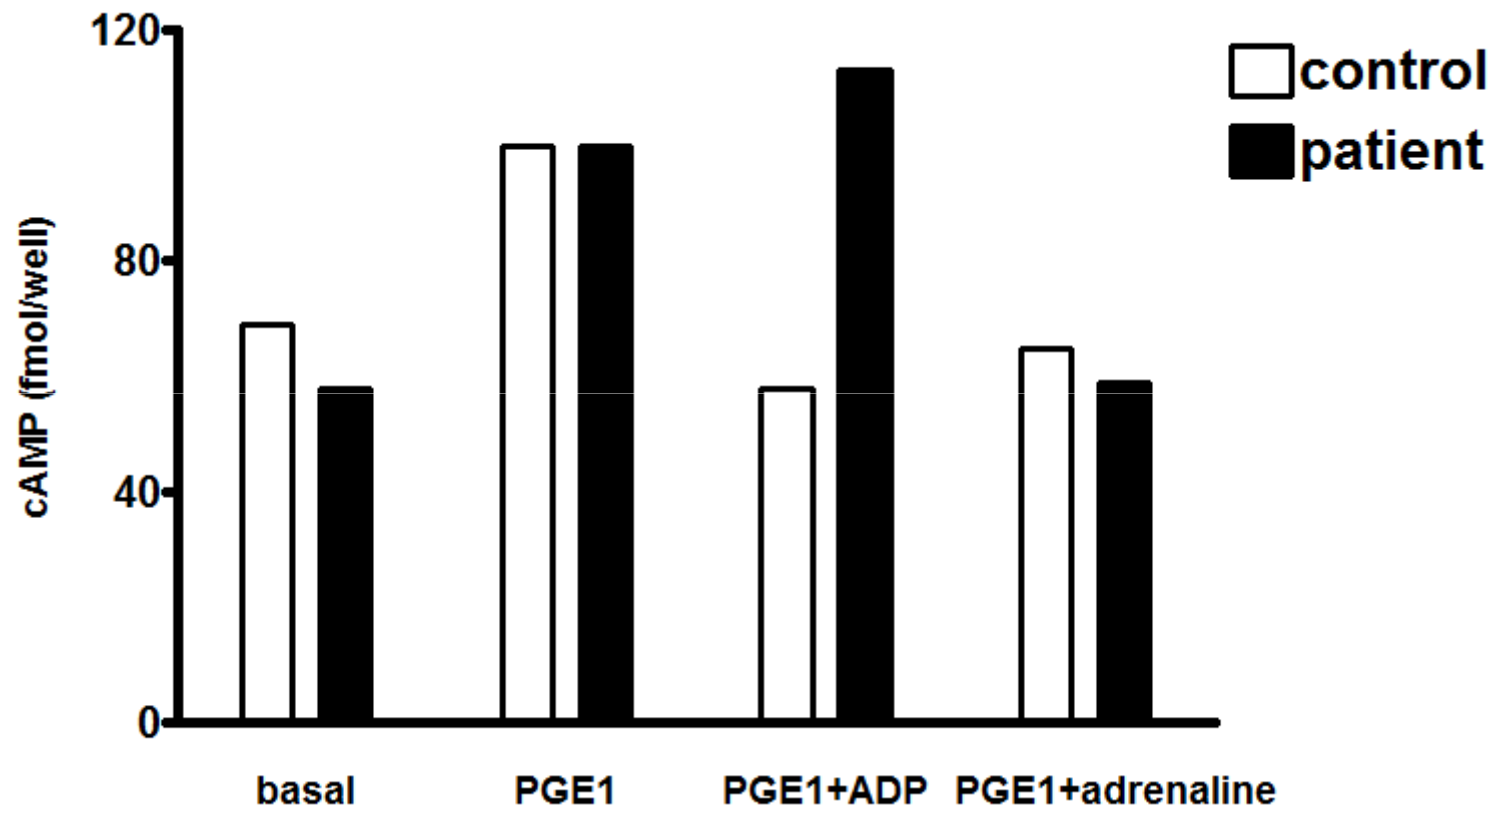

S-Figure 5

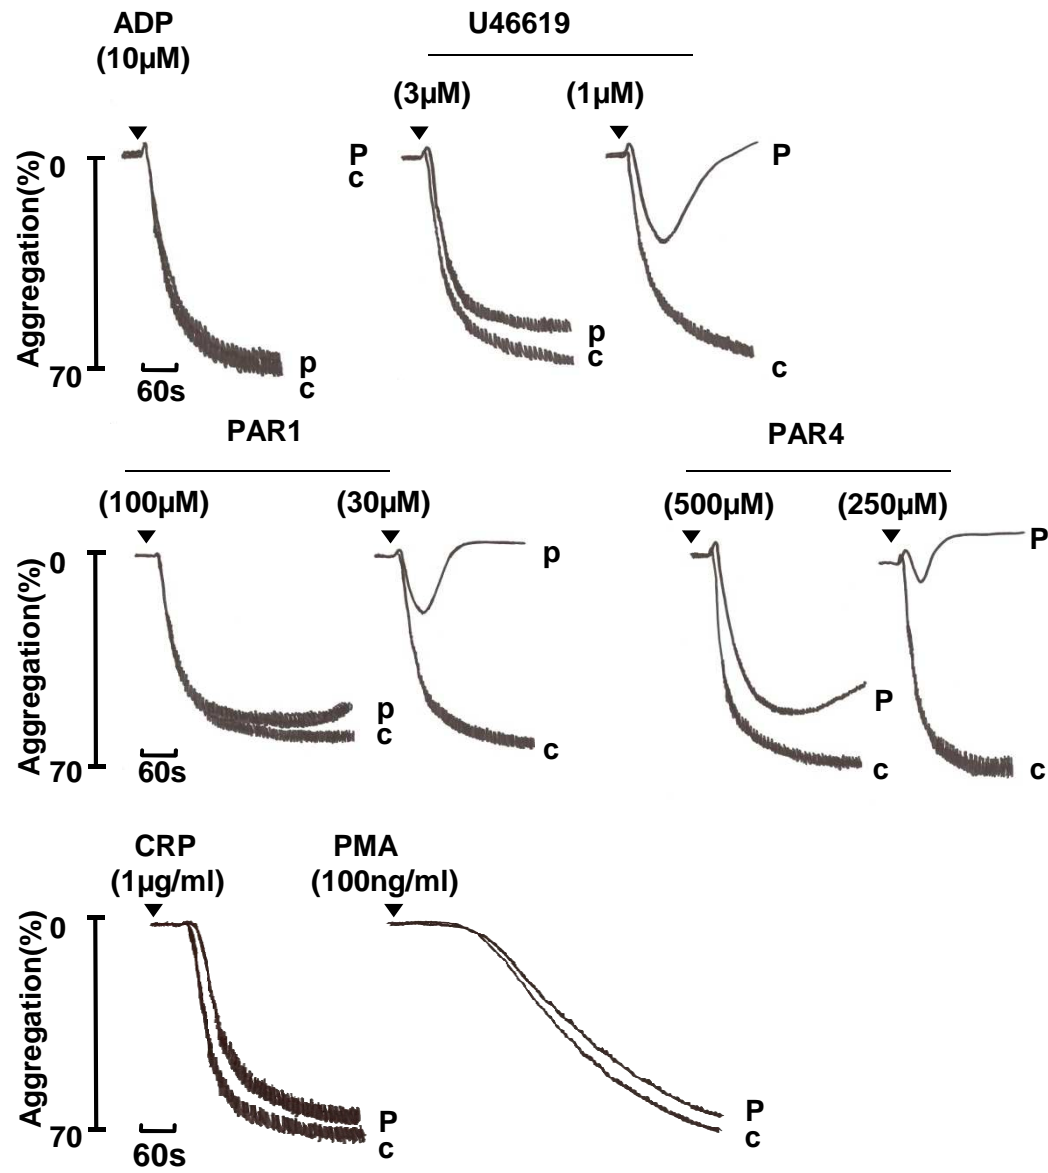

Supplement: supp_blood-2012-07-444281_Document1.pdf [file supp_blood-2012-07-444281_Document1.pdf]
